# Supplementary material for: An Economic Method to Identify Cultivars and Elite Lines in Radish (Raphanus sativus L.) for Small Seed Companies and Independent Breeders
Source: MDPI journal article supplement (doi:10.3390/horticulturae9020140), 2023-01-20
Supplement: s1 [file s1]

**Table S1.** The list of radish cultivars used in this study.

| No. | Abbreviation | Cultivars           | Types                           | Sources          |
|-----|--------------|---------------------|---------------------------------|------------------|
| 1   | SP01         | Sincheongilpum      | Large root (Spring)             | Farm hannog      |
| 2   | SP02         | Sambakja            | Large root (Spring)             | Farm hannog      |
| 3   | SP03         | Cheongilchun        | Large root (Spring)             | Asia seed        |
| 4   | SP04         | Alpinegold          | Large root (Spring)             | Asia seed        |
| 5   | SP05         | Chunganghaneul      | Large root (Spring)             | Dailim seed      |
| 6   | SP06         | Chungdaebom         | Large root (Spring)             | Nongwoo bio      |
| 7   | SP07         | Daedeulbo           | Large root (Spring)             | Nongwoo bio      |
| 8   | SP08         | Gamtan              | Large root (Spring)             | Nongwoo bio      |
| 9   | SP09         | Junmuhumu           | Large root (Spring)             | Koregon          |
| 10  | SP10         | Neulsaengbom        | Large root (Spring)             | Nongwoo bio      |
| 11  | SP11         | Saepureunbom        | Large root (Spring)             | Farm hannog      |
| 12  | SP12         | Sanggam             | Large root (Spring)             | Farm hannog      |
| 13  | SP13         | Sanggreen           | Large root (Spring)             | NH Nonghyup seed |
| 14  | SP14         | Style Bom           | Large root (Spring)             | Nongwoo bio      |
| 15  | SP15         | Supergiljo          | Large root (Spring)             | Nongwoo bio      |
| 16  | SP16         | Taecheong           | Large root (Spring)             | Syngenta Korea   |
| 17  | SP17         | Topgreenbom 2ho     | Large root (Spring)             | Kwonnonng seed   |
| 18  | SP18         | YR Sinchyongjanggun | Large root (Spring)             | Koregon          |
| 19  | SP19         | Sunbaekok           | Large root (Spring (Summer))    | Dannong seed     |
| 20  | HL01         | Kwandongyeorum      | Large root (High Land)          | Farm hannog      |
| 21  | HL02         | Manchudaepung       | Large root (High Land)          | Gonong seed      |
| 22  | HL03         | Mansahyeongtong     | Large root (High Land)          | Nongwoo bio      |
| 23  | HL04         | Baekbong            | Large root (High Land)          | Farm hannog      |
| 24  | HL05         | Cheonggangyeoreum   | Large root (High Land)          | PPS              |
| 25  | HL06         | Cheonghaejin        | Large root (High Land)          | Thekiban         |
| 26  | HL07         | Cheonghwang         | Large root (High Land)          | Nongwoo bio      |
| 27  | HL08         | Gangchu             | Large root (High Land)          | Syngenta Korea   |
| 28  | HL09         | Gangjamujeok        | Large root (High Land)          | Jenong S&T       |
| 29  | HL10         | Gangpyeong          | Large root (High Land)          | PPS              |
| 30  | HL11         | Kwancheongplus      | Large root (High Land)          | Farm hannog      |
| 31  | HL12         | Nubira              | Large root (High Land)          | Sakata Korea     |
| 32  | HL13         | Tamsrun             | Large root (High Land)          | Farm hannog      |
| 33  | SP01         | Sincheongilpum      | Large root (Spring)             | Farm hannog      |
| 34  | HL14         | Yeongdong           | Large root (High Land)          | Nongwoo bio      |
| 35  | HL15         | YR Wihayeo          | Large root (High Land)          | Farm hannog      |
| 36  | HL16         | Chengrokplus        | Large root (High Land (winter)) | PPS              |

**Table S1.** The list of radish cultivars used in this study (continued).

| No. | Abbreviation | Cultivars            | Types               | Sources         |
|-----|--------------|----------------------|---------------------|-----------------|
| 37  | AU01         | Cheongun             | Large root (Autumn) | Farm hannog     |
| 38  | AU02         | Seohogold            | Large root (Autumn) | Nongwoo bio     |
| 39  | AU03         | Chamjoeun            | Large root (Autumn) | Sakata Korea    |
| 40  | AU04         | Baekja               | Large root (Autumn) | Farm hannog     |
| 41  | AU05         | Cheongbokplus        | Large root (Autumn) | Farm hannog     |
| 42  | AU06         | Cheongpungmyeongweol | Large root (Autumn) | Gonong seed     |
| 43  | AU07         | Cheongunplus         | Large root (Autumn) | Farm hannog     |
| 44  | AU08         | Cheonmyeong          | Large root (Autumn) | Asia seed       |
| 45  | AU09         | Cheonsu              | Large root (Autumn) | Farm hannog     |
| 46  | AU10         | Chungbok             | Large root (Autumn) | Farm hannog     |
| 47  | AU11         | Chunghan             | Large root (Autumn) | Danong seed     |
| 48  | AU12         | Chungomabi           | Large root (Autumn) | Jeil seed       |
| 49  | AU13         | Dalgona              | Large root (Autumn) | Kwonnonng seed  |
| 50  | AU14         | Dongha               | Large root (Autumn) | Asia seed       |
| 51  | AU15         | Gaeulhaneul          | Large root (Autumn) | Danong seed     |
| 52  | AU16         | Gukbo Gold           | Large root (Autumn) | Kwonnonng seed  |
| 53  | AU17         | Hangaeul             | Large root (Autumn) | Sakata Korea    |
| 54  | AU18         | Jangan               | Large root (Autumn) | Kyoungshin seed |
| 55  | AU19         | Meotjinmatkkal       | Large root (Autumn) | Nongwoo bio     |
| 56  | AU20         | Sambokdabal          | Large root (Autumn) | Nongwoo bio     |
| 57  | AU21         | Seoho                | Large root (Autumn) | Nongwoo bio     |
| 58  | AU22         | Sinbong              | Large root (Autumn) | Kyoungshin seed |
| 59  | AU23         | Songbaek             | Large root (Autumn) | Farm hannog     |
| 60  | AU24         | Supertogwang         | Large root (Autumn) | Farm hannog     |
| 61  | AU25         | Togwang              | Large root (Autumn) | Farm hannog     |
| 62  | AU26         | Togwanggold          | Large root (Autumn) | Farm hannog     |
| 63  | WI01         | Cheongjeonggowon     | Large root (Winter) | Nongwoo bio     |
| 64  | WI02         | Nongwoo Osari        | Large root (Winter) | Nongwoo bio     |
| 65  | WI03         | Gyeouldaechan        | Large root (Winter) | Farm hannog     |
| 66  | WI04         | Himchan              | Large root (Winter) | Jenong S&T      |
| 67  | WI05         | Matggalsheongjeong   | Large root (Winter) | PPS             |
| 68  | WI06         | Ollematdong          | Large root (Winter) | Thekiban        |
| 69  | WI07         | Shindaeji            | Large root (Winter) | Farm hannog     |
| 70  | WI08         | Topdong              | Large root (Winter) | Syngenta Korea  |
| 71  | WI09         | Woldongchanmi        | Large root (Winter) | Farm hannog     |
| 72  | SR01         | Gichan               | Small root          | Nongwoo bio     |

**Table S1.** The list of radish cultivars used in this study (continued).

| No. | Abbreviation | Cultivars             | Types                    | Sources         |
|-----|--------------|-----------------------|--------------------------|-----------------|
| 73  | SR02         | Ildeungsohyeong       | Small root               | Farm hannog     |
| 74  | SR03         | Saerom                | Small root               | Syngenta Korea  |
| 75  | SR04         | Seodong               | Small root               | Farm hannog     |
| 76  | SR05         | Sinsuji               | Small root               | Nongwoo bio     |
| 77  | SR06         | Chobom altari         | Small root (Altari)      | Farm hannog     |
| 78  | SR07         | Chorong altari        | Small root (Altari)      | Thekiban        |
| 79  | SR08         | Hwameang altari       | Small root (Altari)      | Nongwoo bio     |
| 80  | SR09         | Shinnamgang altari    | Small root (Altari)      | Farm hannog     |
| 81  | SR10         | Sinjinbom altari      | Small root (Altari)      | Farm hannog     |
| 82  | SR11         | Sinmyeong altari      | Small root (Altari)      | Nongwoo bio     |
| 83  | SR12         | Tongil altari         | Small root (Altari)      | Farm hannog     |
| 84  | SR13         | Walchun altari        | Small root (Altari)      | Asia seed       |
| 85  | SR14         | Jinmat altari         | Small root (Altari)      | Asia seed       |
| 86  | YO01         | Asiachunha            | Young radish (Yeolmu)    | Asia seed       |
| 87  | YO02         | Dosi                  | Young radish (Yeolmu)    | Koregon         |
| 88  | YO03         | Hong Vit Yeol         | Young radish (Yeolmu)    | Asia seed       |
| 89  | YO04         | Hukdanyeorumyeol      | Young radish (Yeolmu)    | Sakata Korea    |
| 90  | YO05         | Janchiyeol            | Young radish (Yeolmu)    | Nongwoo bio     |
| 91  | YO06         | Jinboriyeol           | Young radish (Yeolmu)    | Nongwoo bio     |
| 92  | YO07         | Matkkal               | Young radish (Yeolmu)    | Syngenta Korea  |
| 93  | YO08         | Namgwang              | Young radish (Yeolmu)    | Kyoungshin seed |
| 94  | YO09         | Shinmanbokyeol        | Young radish (Yeolmu)    | Sakata Korea    |
| 95  | YO10         | YR heukboseokyeol     | Young radish (Yeolmu)    | Nongwoo bio     |
| 96  | PR01         | Chunchujangbackjosang | Pickled radish (Danmuji) | Dailim seed     |
| 97  | PR02         | Chobi                 | Pickled radish (Danmuji) | Koregon         |
| 98  | PR03         | Jangnoksudanmuji      | Pickled radish (Danmuji) | Farm hannog     |
| 99  | PR04         | Worldminong           | Pickled radish (Danmuji) | Nongwoo bio     |
| 100 | DR01         | Anthoful              | Dried radish (Shiraegi)  | Asia seed       |
| 101 | DR02         | Nongcham              | Dried radish (Shiraegi)  |                 |
| 102 | DR03         | Jeil Geongangshiraegi | Dried radish (Shiraegi)  | Jeil seed       |
| 103 | DR04         | Danongshiraegi        | Dried radish (Shiraegi)  | Danong seed     |
| 104 | HA01         | Bordeaux              | High anthocyanin         | Syngenta Korea  |
| 105 | HA02         | Kwonnong Bravo        | High anthocyanin         | Kwonnong seed   |

**Table S2.** The list of radish elite lines used in this study.

| Elite lines | Generations advanced | Parents                | Elite lines | Generations advanced | Parents                |
|-------------|----------------------|------------------------|-------------|----------------------|------------------------|
| 1020        | F <sub>6</sub>       | Line 17× E Cultivar    | 1274        | F <sub>-</sub>       | N Cultivar             |
| 1669        | F <sub>-</sub>       | Line 36                | 1353        | F <sub>5</sub>       | C Cultivar× A Cultivar |
| 7626        |                      |                        | 1430        | F <sub>5</sub>       | D Cultivar× A Cultivar |
| 7628        | F <sub>-</sub>       | Line 27                | 1705        | F <sub>-</sub>       | Line 44                |
| 7633        | F <sub>-</sub>       | Line 29                | 1894        | F <sub>-</sub>       | E Cultivar             |
| 7635        | F <sub>-</sub>       | Line 28                | 7575        | F <sub>4</sub>       | Line 41× Line 40       |
| 7661        |                      |                        | 7577        | F <sub>5</sub>       | Line 40× Line 19       |
| 7705        | F <sub>-</sub>       | Line 27× Line 26       | 7607        | F <sub>5</sub>       | Line 27× Line 43       |
| 7710        |                      |                        | 7623        | F <sub>-</sub>       | Line 30                |
| 7727        | F <sub>6</sub>       | Line 33× Line 34       | 7643        | F <sub>6</sub>       | L Cultivar× Line 20    |
| 7810        | F <sub>6</sub>       | Line 35× M Cultivar    | 7645        | F <sub>6</sub>       | L Cultivar× Line 20    |
| 7832        | F <sub>-</sub>       | Line 14× Line 13       | 7830        | F <sub>-</sub>       | Line 14× Line 13       |
| 1028        | F <sub>6</sub>       | Line 2× E Cultivar     | 7837        | F <sub>7</sub>       | Line 45× Line 14       |
| 1045        | F <sub>6</sub>       | A Cultivar× E Cultivar | 7841        | F <sub>7</sub>       | Line 45× Line 14       |
| 1048        | F <sub>5</sub>       | A Cultivar× Line 2     | 7843        | F <sub>7</sub>       | Line 45× Line 14       |
| 1051        | F <sub>6</sub>       | B Cultivar× A Cultivar | 7846        | F <sub>7</sub>       | Line 3× Line 4         |
| 1052        | F <sub>6</sub>       | B Cultivar× A Cultivar | 7849        | F <sub>-</sub>       | Line 9× Line 10        |
| 1053        | F <sub>6</sub>       | B Cultivar× A Cultivar | 7871        | F <sub>-</sub>       | Line 16                |
| 1054        | F <sub>6</sub>       | B Cultivar× A Cultivar | 1104        | F <sub>-</sub>       | E Cultivar× Line 1     |
| 1062        | F <sub>5</sub>       | E Cultivar× A Cultivar | 1023        | F <sub>-</sub>       | Line 9× Line 10        |
| 1067        | F <sub>5</sub>       | F Cultivar× A Cultivar | 1034        | F <sub>5</sub>       | Line 2× H Cultivar     |
| 1068        | F <sub>-</sub>       | Line 11× Line 7        | 1086        | F <sub>7</sub>       | Line 5× Line 6         |
| 1070        | F <sub>6</sub>       | C Cultivar× A Cultivar | 1090        | F <sub>4</sub>       | I Cultivar             |
| 1072        | F <sub>6</sub>       | J Cultivar             | 1112        | F <sub>7</sub>       | E Cultivar             |
| 1075        | F <sub>7</sub>       | D Cultivar× A Cultivar | 1146        | F <sub>6</sub>       | G Cultivar× Line 1     |
| 1087        | F <sub>7</sub>       | Line 18                | 1149        | F <sub>6</sub>       | G Cultivar× A Cultivar |
| 1089        | F <sub>-</sub>       | Line 9× Line 44        | 1369        | F <sub>-</sub>       | Line 7× Line 8         |
| 1093        | F <sub>-</sub>       | Line 7× Line 12        | 1392        | F <sub>6</sub>       | C Cultivar× A Cultivar |
| 1095        | F <sub>-</sub>       | Line 7× Line 11        | 1393        |                      |                        |
| 1099        | F <sub>5</sub>       | H Cultivar             | 7529        | F <sub>5</sub>       | Line 17× Line 40       |
| 1143        | F <sub>-</sub>       | Line 23× Line 24       | 7581        | F <sub>5</sub>       | Line 19× L Cultivar    |
| 1229        | F <sub>5</sub>       | Line 2× E Cultivar     | 7581        | F <sub>5</sub>       | Line 19× L Cultivar    |
| 1237        | F <sub>6</sub>       | Line 2× E Cultivar     | 7638        | F <sub>6</sub>       | L Cultivar× Line 20    |

F<sub>-</sub>: Elite lines went through F<sub>8</sub> or more generation advancement.

**Table S2.** The list of radish elite lines used in this study (continued).

| Elite lines | Generations advanced | Parents                 | Elite lines | Generations advanced | Parents                 |
|-------------|----------------------|-------------------------|-------------|----------------------|-------------------------|
| 7870        | F <sub>-</sub>       | Line 13                 | 7754        |                      |                         |
| 1679        | F <sub>-</sub>       | Line 32                 | 7813        | F <sub>5</sub>       | Line 26 × Line 32       |
| 7858        | F <sub>-</sub>       | Line 26                 | 7821        | F <sub>-</sub>       | Line 15                 |
| 7859        | F <sub>-</sub>       | Line 25                 | 1024        | F <sub>-</sub>       | Line 21 × Line 22       |
| 1006        | F <sub>6</sub>       | Line 5 × E Cultivar     | 1268        | F <sub>7</sub>       | D Cultivar × A Cultivar |
| 1007        | F <sub>7</sub>       | Line 5 × E Cultivar     | 1346        | F <sub>6</sub>       | E Cultivar × Line 1     |
| 1010        | F <sub>-</sub>       | Line 5 × Line 6         | 7624        | F <sub>7</sub>       | Line 42                 |
| 1013        | F <sub>6</sub>       | Line 17 × E Cultivar    | 7872        |                      |                         |
| 1019        | F <sub>6</sub>       | Line 17 × E Cultivar    | 1021        |                      |                         |
| 1036        | F <sub>5</sub>       | G Cultivar × A Cultivar | 1085        |                      |                         |
| 1079        | F <sub>7</sub>       | D Cultivar × E Cultivar | 1145        | F <sub>6</sub>       | Line 8 × E Cultivar     |
| 1081        | F <sub>5</sub>       | D Cultivar × E Cultivar | 1152        |                      |                         |
| 1083        | F <sub>7</sub>       | Line 5 × E Cultivar     | 1159        |                      |                         |
| 1109        | F <sub>-</sub>       | E Cultivar              | 1160        |                      |                         |
| 1134        | F <sub>5</sub>       | Line 17 × E Cultivar    | 1659        |                      |                         |
| 1158        | F <sub>7</sub>       | Line 11 × Line 7        | 1666        |                      |                         |
| 1159        | F <sub>6</sub>       | C Cultivar × E Cultivar | 1877        |                      |                         |
| 1162        | F <sub>5</sub>       | D Cultivar × E Cultivar | 1889        |                      |                         |
| 1166        | F <sub>-</sub>       | Line 7 × Line 11        | 7537        |                      |                         |
| 1670        | F <sub>-</sub>       | Line 37                 | 7713        |                      |                         |
| 1671        | F <sub>-</sub>       | Line 39                 | 7714        |                      |                         |
| 1678        | F <sub>-</sub>       | Line 31                 | 7718        |                      |                         |
| 1895        | F <sub>-</sub>       | K Cultivar              | 7874        |                      |                         |
| 7674        | F <sub>7</sub>       | Line 5 × E Cultivar     |             |                      |                         |
| 7719        | F <sub>5</sub>       | Line 33 × Line 32       |             |                      |                         |

F<sub>-</sub>: Elite lines went through F<sub>8</sub> or more generation advancement.

**Table S3.** Information on 21 molecular markers showing polymorphism among 12 radish cultivars.

| Primer   | Chr. <sup>1</sup> | Genetic Position | Marker type | Forward                   | Reverse                 | T <sub>m</sub> (°C) | N <sub>A</sub> <sup>2</sup> |
|----------|-------------------|------------------|-------------|---------------------------|-------------------------|---------------------|-----------------------------|
| RsIBP15  | 1                 | 90.131           | IBP         | tctaacttcagcgcttgt        | gccgaagtgtcctttaccaa    | 55                  | 3                           |
| RsIBP13  | 1                 | 95.845           | IBP         | catctttgatctgcacccaa      | caccaatgcggatcatagtg    | 55                  | 2                           |
| RsIBP06  | 1                 | 117.274          | IBP         | gtcaaatccgcagcttcttc      | gcaatgccactgatctctga    | 54                  | 4                           |
| RsInD70  | 2                 | 154.623          | InDel       | tcctaataatgatctcagcttatcc | tcacagttctgaagtcaattgtc | 55                  | 2                           |
| RsInD38  | 2                 | 211.991          | InDel       | ttgtcacgataagtaacgaacag   | gaggaaaaatctaccacatggag | 55                  | 2                           |
| RsInD61  | 3                 | 63.501           | InDel       | attgctgtgtaaagtctagctag   | gttcttcattgttacagagagg  | 53                  | 2                           |
| RsInD50  | 4                 | 52.188           | InDel       | attgaaaaggtgaacaacgagat   | aaatgaaaggggttagctacac  | 55                  | 2                           |
| RsInD22  | 4                 | 153.731          | InDel       | tctacaataacacacgcacatac   | ctccattctacttctatccgtca | 54                  | 2                           |
| RsIBP17  | 5                 | 85.928           | IBP         | aacgtcatccgaacttctc       | atcgctcaagcgagttcgt     | 55                  | 2                           |
| RsIBP08  | 5                 | 157.602          | IBP         | ctggctcgagttggattctc      | aggccactcctctgattcct    | 55                  | 2                           |
| RsSSR100 | 6                 | 132.961          | SSR         | gggatcatcacacttgagca      | agatgtcctcgtaagccacg    | 54                  | 2                           |
| RsInD36  | 6                 | 134.048          | InDel       | gtctcctaattgtctgtgtgtt    | tgtcgtgtggagttacatgtata | 55                  | 2                           |
| RsInD37  | 6                 | 174.734          | InDel       | tggaaatgaaattctgtctcacc   | gcatcaaggaaacagaggtaaat | 55                  | 2                           |
| RsSSR108 | 7                 | 45.24            | SSR         | agcgcaatttcatgggtatc      | cttctccaacgcaaagaac     | 53                  | 2                           |
| RsInD58  | 7                 | 58.936           | InDel       | taacatttgcgatcgagaaaaga   | caccttcttctcctctatatcc  | 55                  | 2                           |
| RsInD42  | 7                 | 81.288           | InDel       | actgtaagtctgcaacattaacc   | ggaaagctcttcttttagtggtt | 55                  | 2                           |
| RsInD60  | 8                 | 91.735           | InDel       | aatccaaaaccatctgagaatcg   | ttggagaagatgatctctgtcaa | 56                  | 2                           |
| RsSSR104 | 8                 | 10.903           | SSR         | tcgtgaaatcctggaagctc      | gtcccgagaaacttgatgtc    | 55                  | 2                           |
| BrEST03  | 9                 | 58.116           | IBP         | catcgacctcaaggttcctc      | ccggagcaacacacaagtta    | 55                  | 2                           |
| RsInD79  | 9                 | 124.755          | InDel       | tatcccttgttcagaactgtaa    | ttagcctctggttagctaatga  | 55                  | 2                           |
| RsInD25  | 9                 | 137.67           | InDel       | tcttcttctctttagtgcttg     | atttcacccctaagtaccacat  | 55                  | 2                           |

<sup>1</sup> Chromosome number<sup>2</sup> The number of alleles

**Table S4.** The pairs of genetically similar radish cultivars identified in previous studies.

| Cultivars           |              | Genetic similarity | Marker types | References         |
|---------------------|--------------|--------------------|--------------|--------------------|
| Pyungganggimjang    | Chongjinju   | 0.91               | AFLP         | Choe et al., 2002  |
| Baekja              | Ocbong       | 0.98               | AFLP         | Choe et al., 2002  |
| Baekja              | Chongil      | 0.98               | AFLP         | Choe et al., 2002  |
| Togwanggold         | Supertogwang | 1.00               | SSR          | Bae et al., 2015   |
| YR Sinchyongjanggun | Junmuhumu    | 0.96               | SSR          | Lee and Park, 2017 |
| Cheongun            | Seoho        | 0.96               | SSR          | Lee and Park, 2017 |

**Table S5.** The pairs of genetically similar radish cultivars identified in previous studies.

| Elite lines | Generation separated | Parents                 | Generations advanced |
|-------------|----------------------|-------------------------|----------------------|
| 1070        | F <sub>2</sub>       | cultivar C × cultivar A | F <sub>6</sub>       |
| 1392        |                      |                         | F <sub>5</sub>       |
| 1109        | S <sub>2</sub>       | cultivar E (Selfing)    | S-                   |
| 1894        |                      |                         | S-                   |
| 1019        | F <sub>4</sub>       | line 17 × cultivar E    | F <sub>6</sub>       |
| 1020        |                      |                         | F <sub>6</sub>       |
| 1081        | F <sub>4</sub>       | cultivar D × cultivar E | F <sub>5</sub>       |
| 1162        |                      |                         | F <sub>5</sub>       |
| 1007        | F <sub>5</sub>       | line 5 × cultivar E     | F <sub>7</sub>       |
| 1083        |                      |                         | F <sub>7</sub>       |
| 7837        | F <sub>5</sub>       | line 45 × line 14       | F <sub>6</sub>       |
| 7841        |                      |                         | F <sub>6</sub>       |
| 7843        |                      |                         | F <sub>6</sub>       |
| 1051        | F <sub>5</sub>       | cultivar B × cultivar A | F <sub>6</sub>       |
| 1052        |                      |                         | F <sub>6</sub>       |
| 1053        |                      |                         | F <sub>6</sub>       |
| 1054        |                      |                         | F <sub>6</sub>       |
| 1075        | F <sub>6</sub>       | cultivar D × cultivar A | F <sub>7</sub>       |
| 1268        |                      |                         | F <sub>7</sub>       |
