# Supplementary material for: An Economic Method to Identify Cultivars and Elite Lines in Radish (Raphanus sativus L.) for Small Seed Companies and Independent Breeders
Source: MDPI journal article supplement (doi:10.3390/horticulturae9020140), 2023-01-20
Supplement: s1 [file s1]

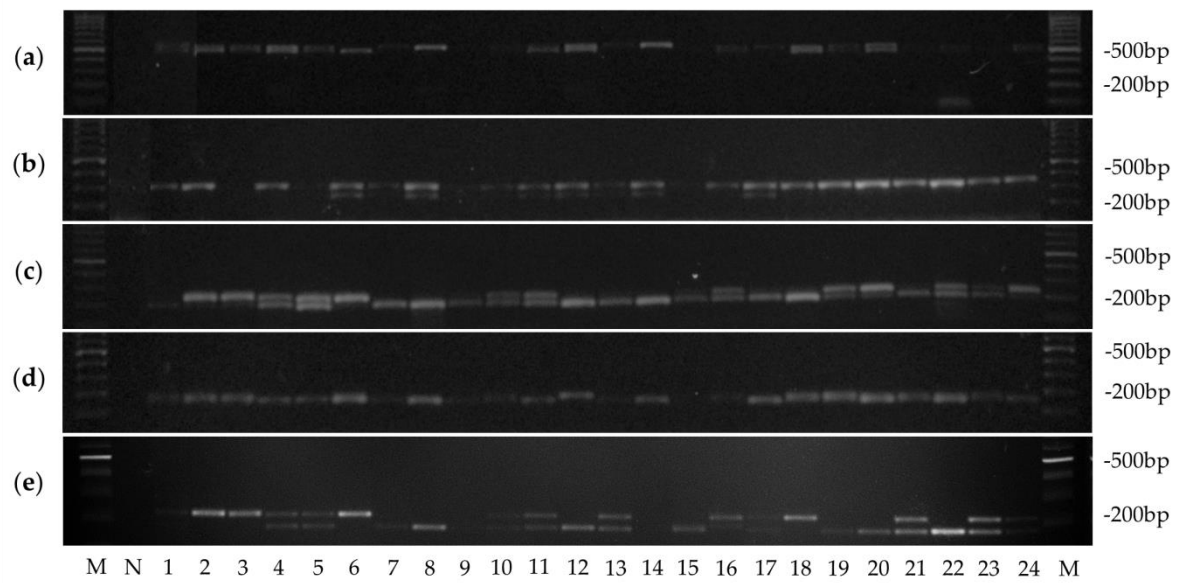

**Figure S1.** Examples of polymorphism from genotyping 24 radish cultivars using RsIBP15 (a); RsIBP13 (b); RsSSR104 (c); RsIBnD79 (d) and RsSSR108 (e) markers. The numbers below were corresponded to supplementary table 1. M: 100bp ladder and N: negative control (distilled water).

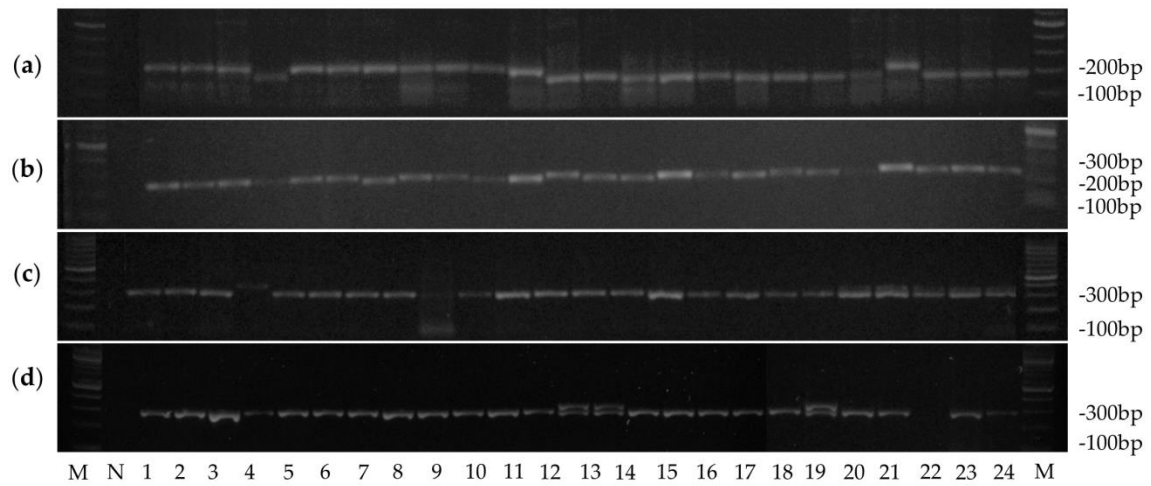

**Figure S2.** Examples of polymorphism from genotyping 24 radish elite lines using RsInD38 (a); RsInD37 (b); RsSSR108 (c) and BrEST03 (d) markers. M: 1kb ladder, N: negative control (distilled water), 1: 1006, 2: 1007, 3: 1010, 4: 1013, 5: 1019, 6: 1020, 7: 1021, 8: 1023, 9: 1024, 10: 1028, 11: 1034, 12: 1036, 13:1045, 14: 1048, 15: 1051, 16: 1052, 17: 1053, 18: 1054, 19: 1062, 20: 1067, 21: 1068, 22: 1070, 23: 1072, and 24: 1075. M: 100bp ladder and N: negative control (distilled water).
